# Supplementary material for: Size-selected Fe3O4–Au hybrid nanoparticles for improved magnetism-based theranostics
Source: Beilstein J Nanotechnol. 2018 Oct 16;9:2684–99. doi: 10.3762/bjnano.9.251 (PMC6204820; doi:10.3762/bjnano.9.251)
Supplement: File 1 — Additional experimental information. [file Beilstein_J_Nanotechnol-09-2684-s001.pdf]

**Supporting Information**  
**for**  
**Size-selected Fe<sub>3</sub>O<sub>4</sub>–Au hybrid nanomaterials for**  
**improved magnetism-based theranostics**

Maria V. Efremova<sup>1,2,‡</sup>, Yulia A. Nalench<sup>2,‡</sup>, Eirini Myrovali<sup>3</sup>, Anastasiia S. Garanina<sup>1,2</sup>, Ivan S. Grebennikov<sup>2</sup>, Polina K. Gifer<sup>2</sup>, Maxim A. Abakumov<sup>2,4</sup>, Marina Spasova<sup>5</sup>, Makis Angelakeris<sup>3</sup>, Alexander G. Savchenko<sup>2</sup>, Michael Farle<sup>5</sup>, Natalia L. Klyachko<sup>1,2</sup>, Alexander G. Majouga<sup>1,2,6</sup> and Ulf Wiedwald<sup>\*2,5</sup>

Address: <sup>1</sup>Department of Chemistry, Lomonosov Moscow State University, Moscow, 119991, Russia, <sup>2</sup>National University of Science and Technology «MISIS», Moscow, 119049, Russia, <sup>3</sup>Physics Department, Aristotle University of Thessaloniki, Thessaloniki, 54124, Greece, <sup>4</sup>Department of Medical Nanobiotechnology, Russian National Research Medical University, Moscow, 117997, Russia, <sup>5</sup>Faculty of Physics and Center for Nanointegration Duisburg-Essen, University of Duisburg-Essen (CENIDE), Duisburg, 47057, Germany and <sup>6</sup>D. Mendeleev University of Chemical Technology of Russia, Moscow, 125047, Russia

Email: Ulf Wiedwald - ulf.wiedwald@uni-due.de

\* Corresponding author

‡ These authors contributed equally

**Additional experimental information**

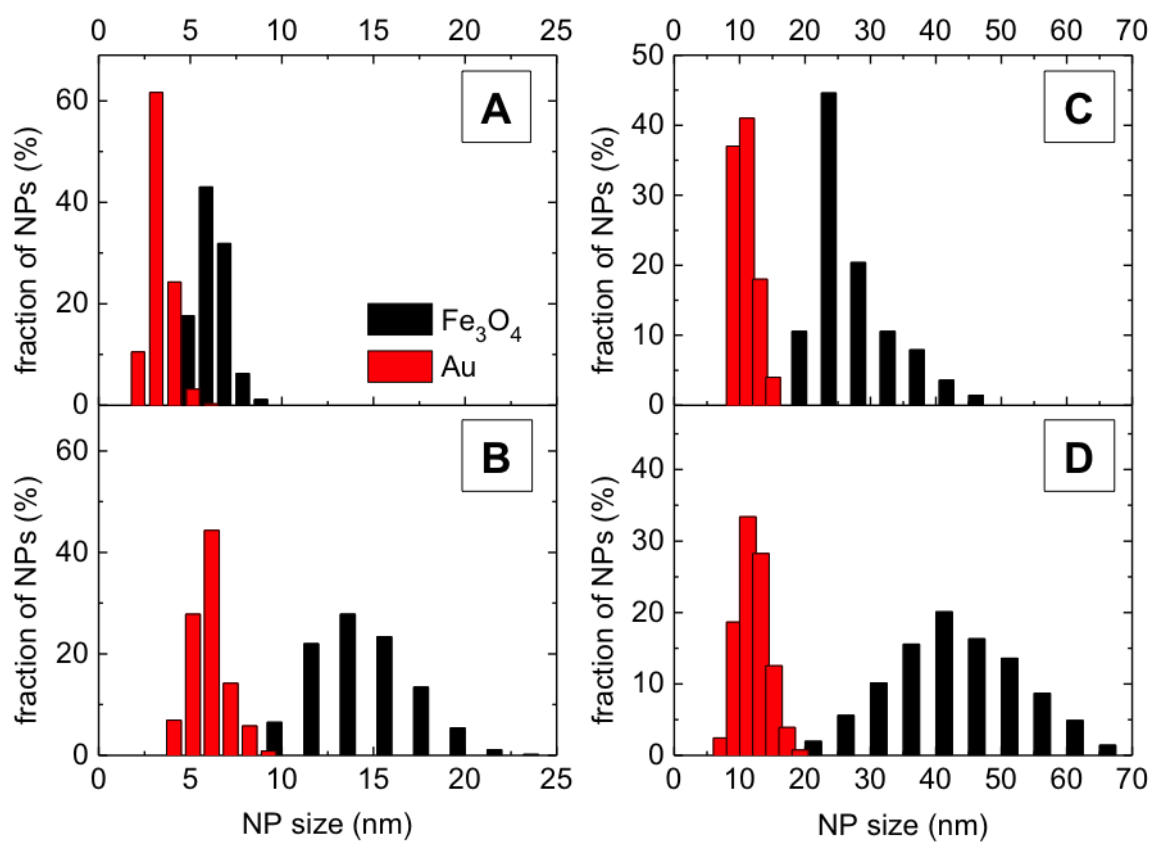

**Figure S1:** Size distributions calculated from TEM images of magnetite (black) and gold (red) parts of NPs for the samples with in situ synthesized Au seeds: A) MNP-6; B) MNP-15; and with pre-synthesized Au seeds: C) MNP-25; D) MNP-44.

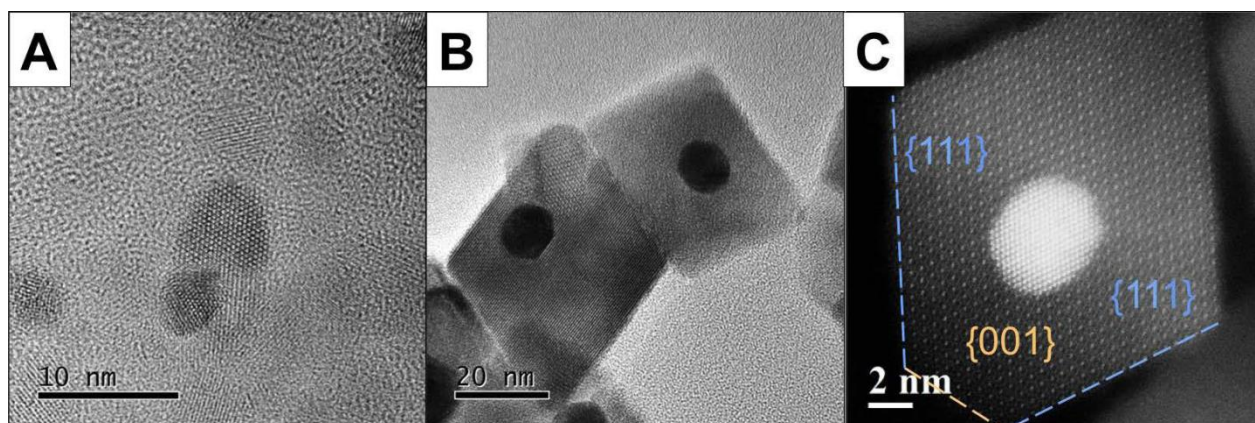

**Figure S2:** HRTEM images of size-selected magnetite-gold NPs: MNP-6 (A), MNP-44 (B), MNP-25 (C).

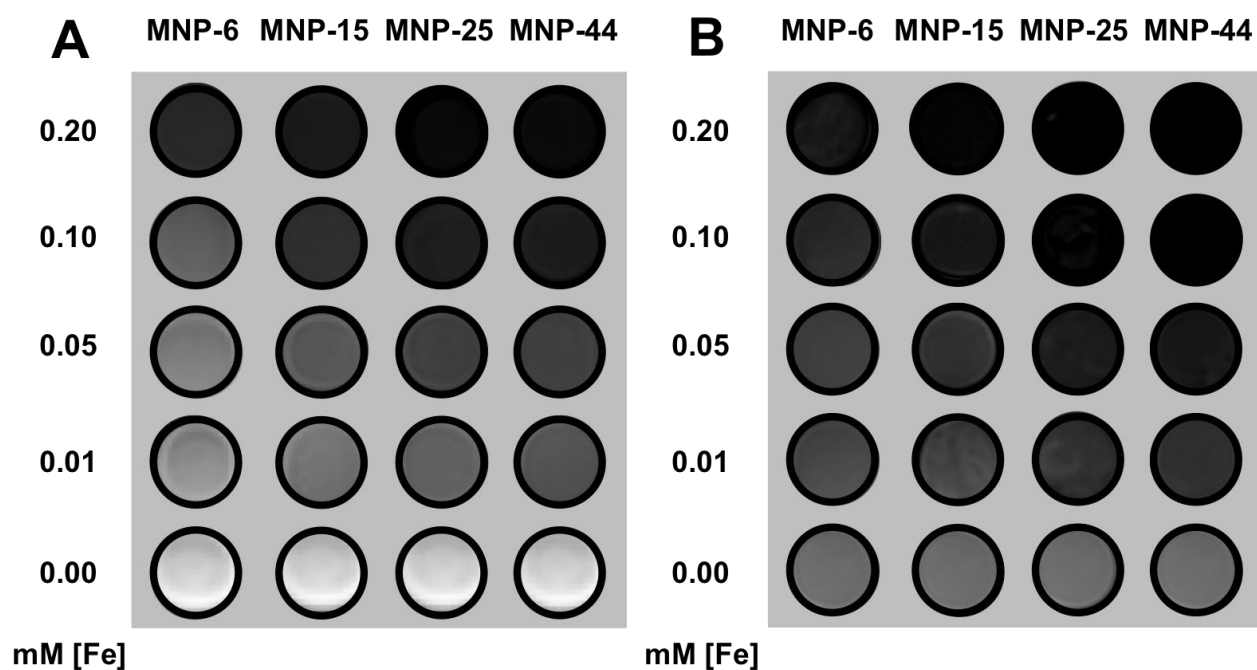

**Figure S3:** Series of  $T_2$ -weighted images of NPs solutions in water (A) and 2% agarose (B) acquired at  $TE = 48$  ms and concentrations ranging from 0.00 to 0.20 mM Fe.

**Table S1:** Hydrodynamic size of hybrid Fe<sub>3</sub>O<sub>4</sub>-Au NPs, stabilized in water by DSPE-PEG-COOH determined by dynamic light scattering. Results are shown as means  $\pm$  standard deviation.

| Sample         | Hydrodynamic diameter, nm |
|----------------|---------------------------|
| MNP-6          | 95 $\pm$ 2                |
| MNP-15         | 112 $\pm$ 3               |
| MNP-25         | 121 $\pm$ 5               |
| MNP-44         | 160 $\pm$ 9               |
| MNP-25 in RPMI | 123 $\pm$ 7               |

**Table S2:** A cell viability study (MTS assay) of 4T1 cells after 15 min and 30 min of incubation: “RPMI” – culture medium without NPs at 37 °C; “NPs + no AMF” – in the presence of MNP-25 in cell medium at 37 °C; “NPs + AMF” – in the presence of MNP-25 in the cell medium heated up to 46  $\pm$  1 °C in 261–393 kHz, 25 mT AMF.

| Sample       | 15 min      | 30 min      |
|--------------|-------------|-------------|
| RPMI         | 100 $\pm$ 3 | 100 $\pm$ 2 |
| NPs + no AMF | 97 $\pm$ 5  | 91 $\pm$ 2  |
| NPs + AMF    | 78 $\pm$ 1  | 21 $\pm$ 9  |

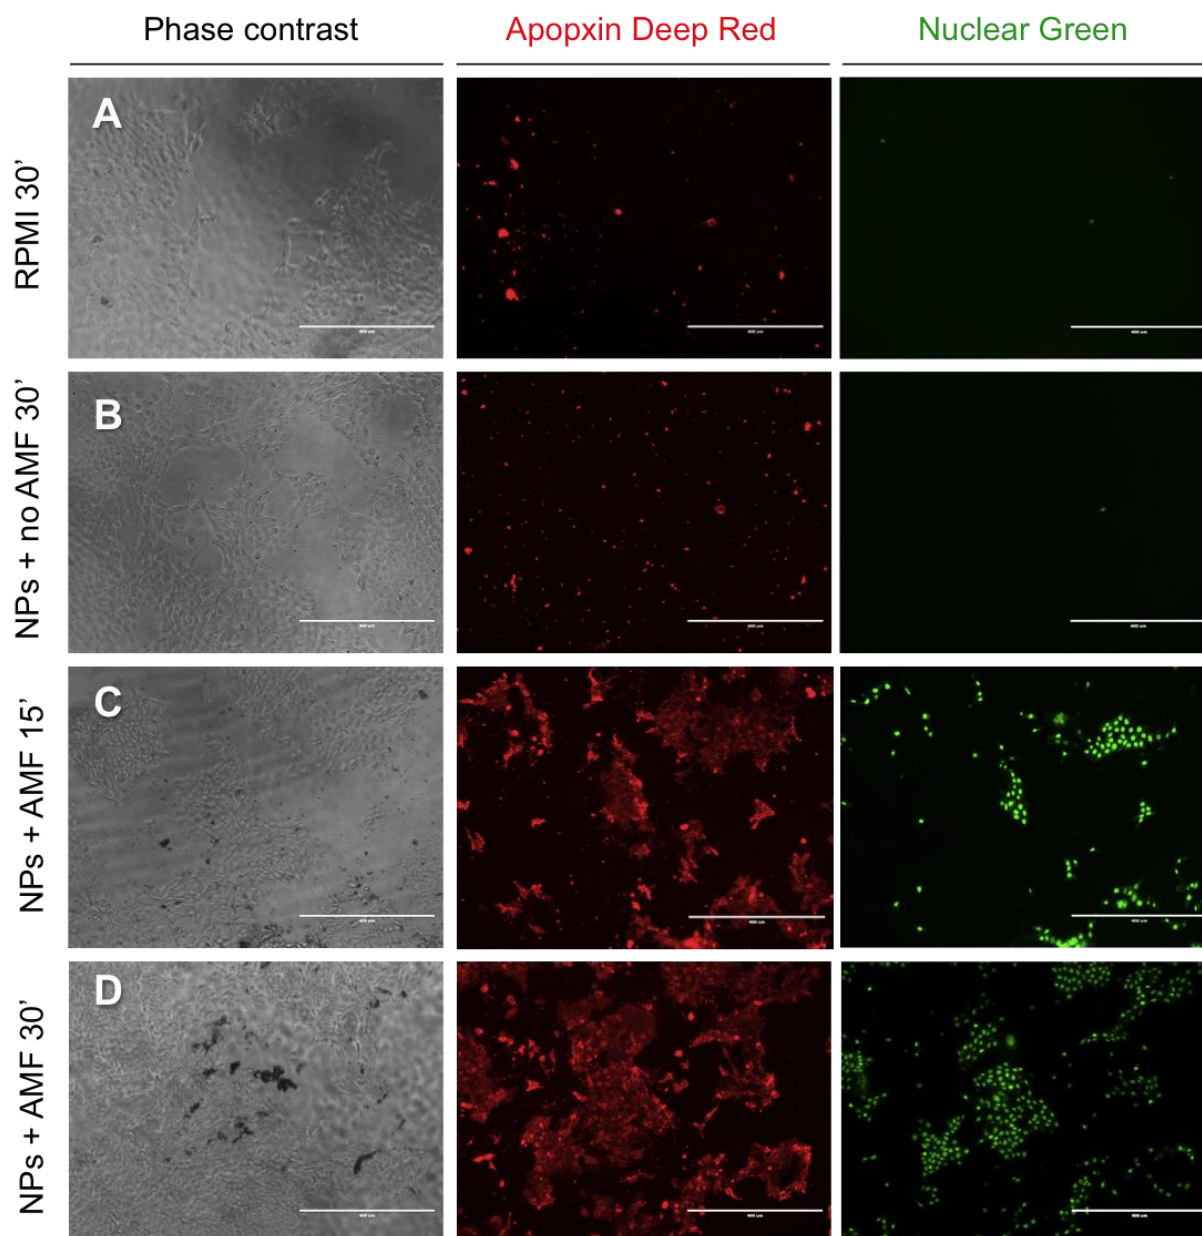

**Figure S4:** Apoptosis/necrosis activation in 4T1 cells, cultivated with polymer-stabilized MNP-25 NPs ( $3.6 \text{ mg}\cdot\text{mL}^{-1} \text{ Fe}$ ), phase contrast (left column) and fluorescent microscopy, intravital staining with Apopxin Deep Red (middle column) and Nuclear Green (right column). A) Control cells without NPs; B) cells incubated with NPs at  $37^\circ\text{C}$  in zero AMF; C) cells incubated with NPs in 261–393 kHz, 25 mT AMF ( $46 \pm 1^\circ\text{C}$ ) during 15 min; D) cells incubated with NPs in 261–393 kHz, 25 mT AMF ( $46 \pm 1^\circ\text{C}$ ) during 30 min. Scale bar corresponds to  $400 \mu\text{m}$ .

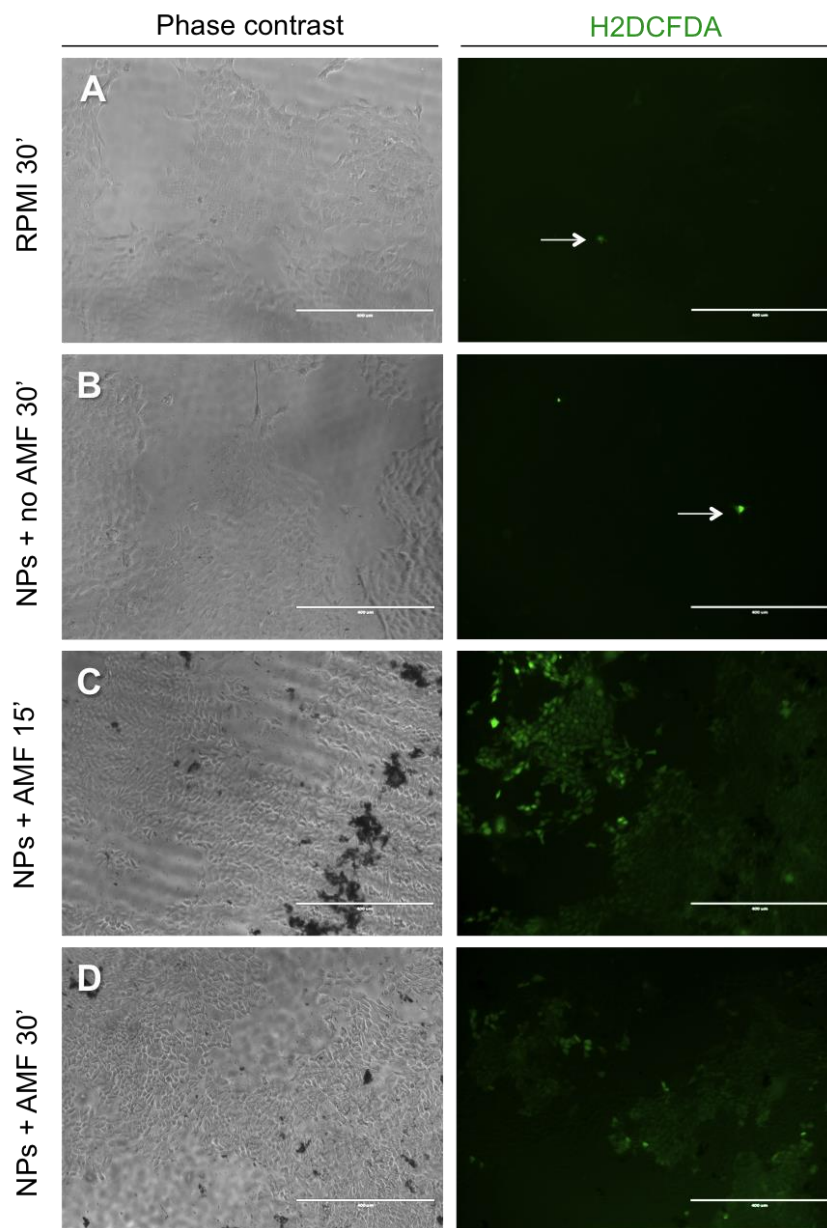

**Figure S5:** Reactive oxygen species (ROS) production by 4T1 cells, cultivated with polymer-stabilized MNP-25 NPs ( $3.6 \text{ mg} \cdot \text{mL}^{-1} \text{ Fe}$ ), phase contrast (left column) and fluorescent microscopy, intravital staining with H2DCFDA (right column). A) Control cells without NPs; B) cells incubated with NPs at  $37^\circ \text{C}$  in zero AMF; C) cells incubated with NPs in 261–393 kHz, 25 mT AMF ( $46 \pm 1^\circ \text{C}$ ) during 15 min; D) cells incubated with NPs in 261–393 kHz, 25 mT AMF ( $46 \pm 1^\circ \text{C}$ ) during 30 min. White arrows show single cells with increased level of ROS production. Scale bar corresponds to  $400 \mu\text{m}$ .

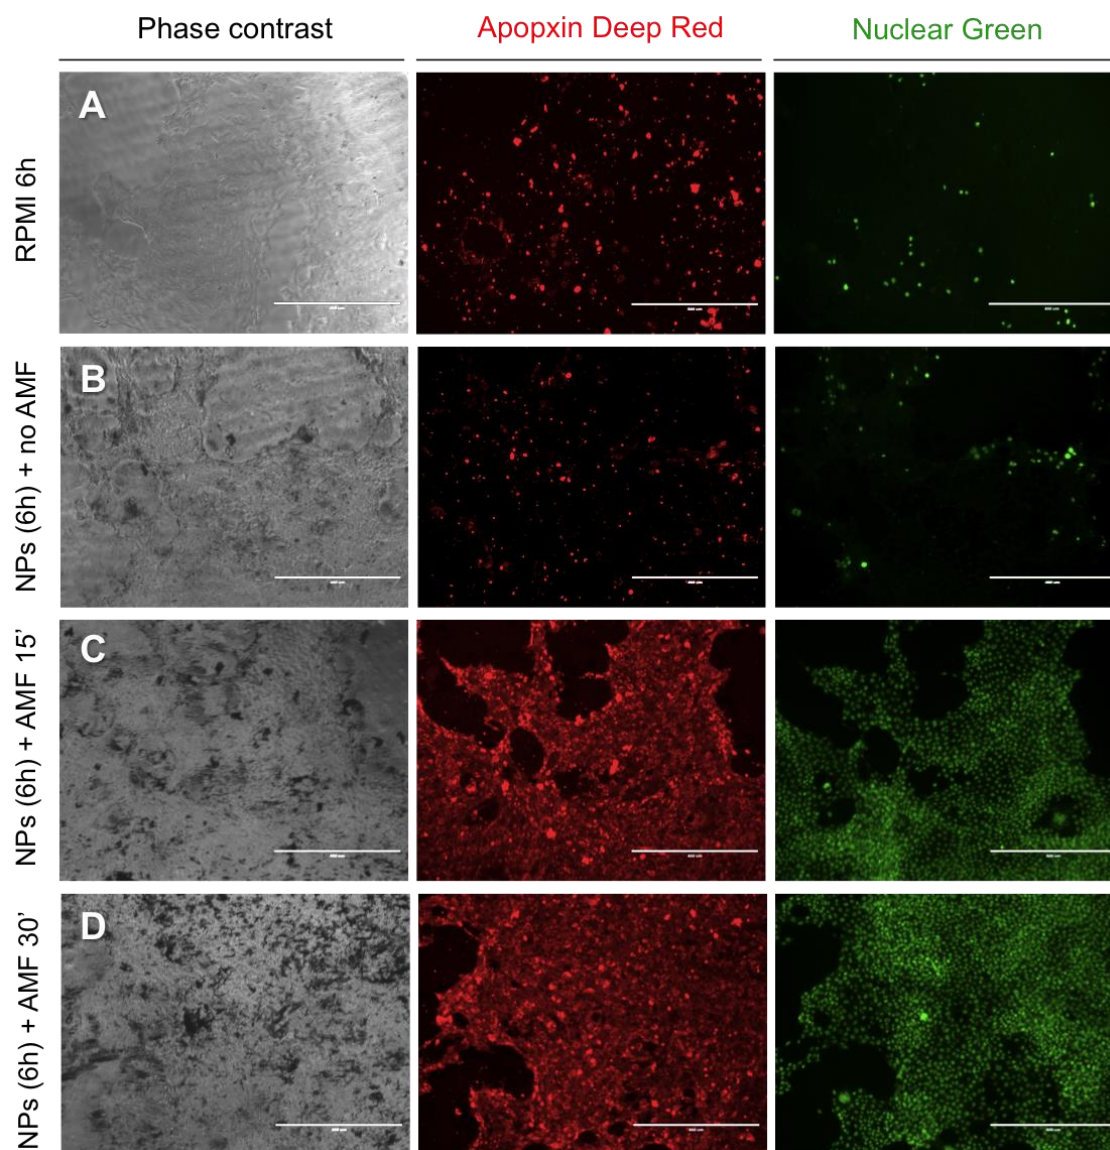

**Figure S6:** Apoptosis/necrosis activation in 4T1 cells, preliminary cultivated with polymer-stabilized MNP-25 NPs ( $3.6 \text{ mg} \cdot \text{mL}^{-1} \text{ Fe}$ ) during 6 h, phase contrast (left column) and fluorescent microscopy, intravital staining with Apopxin Deep Red (middle column) and Nuclear Green (right column). A) Control cells without NPs; B) cells incubated with NPs at  $37^\circ \text{C}$  in zero AMF; C) cells incubated with NPs in 261–393 kHz, 25 mT AMF ( $46 \pm 1^\circ \text{C}$ ) during 15 min; D) cells incubated with NPs in 261–393 kHz, 25 mT AMF ( $46 \pm 1^\circ \text{C}$ ) during 30 min. Scale bar corresponds to  $400 \mu\text{m}$ .

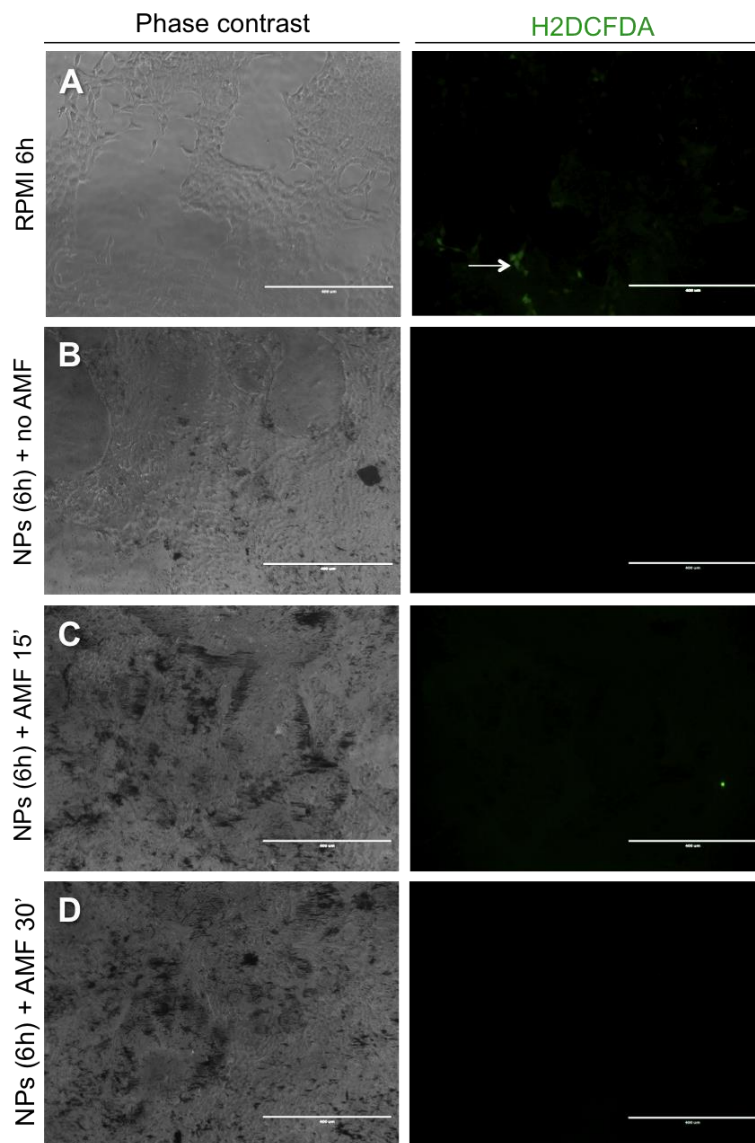

**Figure S7:** Reactive oxygen species (ROS) production by 4T1 cells, preliminary cultivated with polymer-stabilized MNP-25 NPs ( $3.6 \text{ mg}\cdot\text{mL}^{-1} \text{ Fe}$ ) during 6 h, phase contrast (left column) and fluorescent microscopy, intravital staining with H2DCFDA (right column). A) Control cells without NPs; B) cells incubated with NPs at  $37^\circ\text{C}$  in zero AMF; C) cells incubated with NPs in 261–393 kHz, 25 mT AMF ( $46 \pm 1^\circ\text{C}$ ) during 15 min; D) cells incubated with NPs in 261–393 kHz, 25 mT AMF ( $46 \pm 1^\circ\text{C}$ ) during 30 min. White arrows show single cells with increased level of ROS production. Scale bar corresponds to  $400 \mu\text{m}$ .
